# Supplementary material for: Identification of Differentially Expressed Genes Associated with Apple Fruit Ripening and Softening by Suppression Subtractive Hybridization
Source: PLoS One. 2015 Dec 31;10(12):e0146061. doi: 10.1371/journal.pone.0146061 (PMC4697835; doi:10.1371/journal.pone.0146061)
Supplement: S2 Table — (XLSX) [file pone.0146061.s004.xlsx]

## Sheet: Sheet1
Unigene No.	Sequence
Cell wall modification
UN061*	GAATAAATCCATGCCTACTATATATAATAGAAACTTACATATGCTCAAATATTTATTGAACCCATGAGGGTTTTCAAAAGTACAGAGAAAATCTCAATTTGTAAAGCCAAAAGGAAAGCATGAATGATAGCTTGGGAAGGAAGCATTCTAACATTGTATGAACTATACACATGCCCCCCAAAACACCATGTAAACTATATCCACCCTCGATAAATCTATGCTTCTCCACTCTCTGTACACCGAAAAAACTGACCCAGCGCGCTATATCAACCAAATGCCAATGGAGTGACTGTAGTGCTCATTCATATCACAATATCCATACATTGCTTGCAGCCCTCTCAAATAGAAGTTGCCTCATCTGCCTGGCTTACTCTGCTCCGGTGGTGATGCTTTCCATGG…
UN088	CTGAAGAATCTTTGCATGTCCCATGATATATTCCGAAGACAACAATTGGCATCCGCAAATAACAAAGTTAGCACTAAACAAAAAATGAAATAATTTCAATCACAATCAACAAGGGAAATTGTAGGGGAGGGGGAAAGGACAAGGATCATACGTACAACTATATAACAAAATCAACTCACATCCTTGAGTCTCTTAATCAATGCATCTAGAGATTTCTTCTGGGGGTTCTGCCTGCTTCCCCGGCTACCAAAGGTTCCAAATCGCCGCTCTGAAGGATCCCTCAACTTTTCTGAAATAAGCACTACTTTTCTGTAGTCCAAGGTATTGTAACTCCTCTCCCTGATTACCGGATTAAGAAAATTCTCTGGATGATTGCTTAAGAGTAAGTTAACTAATTGC…
UN203*	CCCACTTCTCAGAAGTTGTGAGAATTTTACGTGAGCTGTACCCTACTTTGCAACTTCCAGAGAAGTGTGCAGACGACAAGCCTTTTGTGCCAACATATCAGGTGTCCAAGGAGAAGGCGAAGAGCTTGGGTGTCGAATTTATTCCACTAGATGTTAGCCTCAAGGAAACAGTTGAAAGTCTGAAGGAAAAGGGTTTTGTCAATTTCTGAGTCATTTCAGTACGGTGAAGATGTTTGAAGTAAATTCAGTCGCGGTAAAACATATTATCTGCTTCCAGTTTGTGTTTCCGGTTGGTGACTTAAACTCCGGTTTCCCTTTTTCGGTTTAAGACTTGCTGTCCAGCTTGTTGATTCCTATAGATCACCATTGTGTGTGCAG
UN286	GCCAACAGATAGTAGTTTTAAGAGATATTATTACAATTTAAGTCGAACATCACCCAACACGAGCTAACCTCACAAGAATACAGTAGTACGACAACCAAACAAGCGTAAAATTTACATTTTACAGCGCAAGAGAAAATGGAAAACCGGTAGAACTCAACCAACTACCACCAGCAATAAAGTTGCCCGGGGTATACGCCTCAGCCTCAGTGGGACTTGGAATTACCTTAAACCCCTTCCACGTCACCCTGGTTGCAGTCCCAGCGCCTGGGCCCAGTGGTAGCATACTCTCCATAAAACAAAGTGGCGAGGGCAAAAGTGGCAGACCACTCATGCCATCCAGCAGGGGCAATGATATCAGTTATACTCGACTGCATGATCACAGTCCTTGAATACTCCTTC…
UN289	CCTTGTTTCTTTCACGATCAAGACATATTCAGAAAGAGTTGCACATAATTCTCAAAGGTGAAAAGCCAAGGTTGAAATTACCAAAAGGTTAAAAGCGAAACACTGGTTGTATTATACAAGAAAAATGAAAACCCTAGCTGTTGTAATTACAGTTGGTCTTATTTTTCCCATTTTATCATTCCTTCACTGCAATGGTCAGCAACGCGAGCCCTTCTTGCACCTGAGCGAACCAGCTCCGGCAGTGAGCGAACTCACGAGCGACGACGGTCTCGCACTCAGACTCGATGCTTTGGAGTAACTAGTAGATGCTCCGGCACCGGATGCTGTGAAGAACGCACCGTTTAGCAGCAAATCTCCTGAGGACCTCCAGTTCCATTTGCTCCACTCTTTCTGTGGTGC…
UN313	ATAATTTATCCAATTAAATAAATAAAAACTCGTTTAGCCAGAAACAAGAACATACAAAACAAAAATCCATCCACGATCCTTACTTTCAACGTACTAGCAAGATTTATTCAACAAACTCCACACAAAACCAGAGGAAATAAATAACTAAAAACCACACTTAAGCAAAGATAGATAACTCATAGAGAATAACATTCACCGAGTTTGTAACCCTTATGGGATCAGCAGCAGCATTACTCAAGCATCTGCATGTCCAACCAGTTCCACAAGAAACTTCTCATAGTCTCCGGAAGTGTCCTTGACAATTGCGTGGTCCAAATGAACGCTGTTCCTCCGGTAGTATTCTTCTTTGATGCGCTGCAAGTCAACCTCTGCCCGGGTGGTAATAACTCTAGTAAGCGC…
UN357*	CAGTCAGTCTTCAAATACATTTAATAAGAAATGTCAAAAACAAATATATGCTGATCTACAAATTTTAAGTATGCCATGTAGAGAAAAATAATAATTACAACTTACACATGTTGAAGCAAACATATGAGGAGAAAGTAAACTCTTCAAATTGCTAACCTCACATTTTCCTCTAAGCTAACCACAATAAACTCTTCTACCACAATTCTTAGCCTGAGAAAGAATTATAGGACCTCCTTGAGTTTGAAACAGCTTCTCTTGAAAGGCTCATTGTCCTTCGAAAAACTATTCCGGAAACATATTTCAGCCAAACTGGGAATCCCCCGAAGTTCCATTCAGCGCAAACATAAGGG
UN402	AAAAAAAATTAAAAAGCTTGTACAAAATTACTGCACTTCATATTAAGCTCCGTGCCACTGGCGGGAACAAAACAAAAACACCTGGTCCAGGTGCCCAGTCTGCCCTCCGTGCTCTTGCTCGTTCTGGAATGAGAATTGGTCGTATAGAGGATGTGACTCCAATTCCAACTGACAGCACCCGTAGAAAGGGTGGAAGGAGAGGAAGGAGGCTGTAAGCTTTGCACCTCTTATCTGGTCAGAACTGCTTGTCAGGGTGGTCGCTGTGCCTCAGTTGGATTATGTTACTTCGAAATTAGGCGCTGTTACTTTCGGTTTCGAAACTCTCTAGTTTTTTACTATGTTTTTCGAAAGTTTTATTTCCAATTAATTCGGAAAGAGTTCTGCTACTCTTTTAAGTTT…
UN438	AACACTTTACAAACACATTGACATTTTTCTGCTACACTTGCCACCAAAAGTACGAGAAGCTAGATTCACATACAGAGTTCTATGCTAGAGGCTGATGACATGTAATACACATTAACAGCCTGATAAGTTCCCCATTATGTCTCTCTATCCTTGTTACAGTACATTGCTACCACAGGTTTTCTAAAACCATACCGAAATTTATTGCACCGCCACCCTACCAATAAGGTAGGAATCCAAGTCCTTACTCTGAGCCGGAAAAAGGTGCTTTAGCCGGAACTGCTTCGTGAGGAGCCCCCTTGGTTAGCCAGGAAACGAACAACAACACACGTGATGTTATCTGCACTCCCCCTCTGATACGCTTCCTGCATTAGCCTCTCCGCTGCCTGCTTTGGATCCTGA…
UN463	CCCCGGAAGCACTCAAAGAATGATTTTAACTACAATCTCTCGCTTCTTTCAAGTTTCGCTATTGGGTCTCTCGCTCCTTGTCTAAAATGGAGTAGAATCCCGGAAATAAGACACCAACTTCCCTGGAAGGGTGCCAACAGCCAACCCATCTTGCTATGCATCACATTTTCGTTCTCTGTGTGAATTTTTATGATACAAGCTCACGCCATTTACATGTTCCTCCTGAGTTTGGAAGAACGTTTTGTCCATTAGAAAGCTGCATTCCACAAAGCATTCTCACCTTCTCCACAGCGCTTGTGGACCTCCTTGATCCTCTCGGAAGACTTGCAAATCCCGCTGCAGCTCCAGTCAAATGAAGCAACGCAGACGTTGCCTGCCTGAGCCTTCCACTCACAATCA…
UN469	CCACCATATAGGACGATATTGGACACTTGTTGCTCCAGAAGATGGATGTCCAGAAATCTGTGATTACCGTGGGGCATACAACTCCGATAAGTGCTCATTTAATTGTGGGAAGCCTACTCAAACCTTGTACCATGTACCGAGATCATGGTTACAGTCTTCAAGTAATTTACTTGTTATTTTGGAGGAAACTGGCGGGAATCCATTTGATATTTCAATCAAGTTGCGATCAGCCAGAGTCCTCTGTGCTCAAGTGTCAGAGTCTCACTACCCGCCTGTTCAGAAGTGGTTCAATCCAGACTCTGCGGATGAAAAAATTACAGTAAACGATCTGACACCAGAAATGGCACTTGCAATGTCAAGATGGGTTTACGATATCTTCCATAGAATTTGCCAGCTATG…
UN565*	CGCTTTTTCTCCAAAAAAGTCTCTTGGAAGTGCTCGTATCTTAAATAGTAACTGTGCTATAAACGCAAACATTAGCCAGTCGATTCTCCACCGTTCATGTCACAAACACTTCATCTGTCTTTTTATTGGTCATGTGGCAGCGTTACAATTACTCCCTAATACAAAAAATATAAAGCACATAGCATATATCTCAATCTTTTTACGCGGAATGGAGGAAATCGATGATATTCACGCAGCAAAGCACTCAGGAGGAAATCCTTGCGGGAAGCGCTTGGTATCTCTGCAGTAGTTGTAAATCATGTAGTTCTTCTGAACCCATTTGATTCTCTCTTGCCCTGGGGAATCGAGTGACTGAGTTAACCAGCTCGACTCGTTCGGGGACTTTGAAGGACAACGGGA…
UN641*	ACCAATCCAAATTACTTTATTCATTAAATAATAGTGATGACAATGAATAAATACAAATACAAATCAAATAGGTGCCCAAACTTCTCTAAAATCTATAAAGGTGGCACCAAAAAATAAGTGAAGTCCCAACCAATATCCGAATAATAATTCACCAAACCAAAACAACTCCATCTTAATTTCTTCATTCAATAACCAGTCGGAAACTCGCACGTCCCATAGCTTGGAGGTTGAGCAACAACGTAGGCAGCACCACCGAAATCACACGTGCCAGTCCGGCGTGCTTTCTTCTGATAAAAACTATTGAAAGCGTACGAAGCGTGCGCCTCAAGCGTATTAGGATTAAAACACGTGGACCCTTCCTGAATCGAACGGCAGTCAGCTCCTCCTTCTCCGCAAGCA…
Anthocyanin biosynthesis
UN011	ACAAAAAAAAAGGTTTCCATTGCTCGCCAGATTACTGATCTTTCCATCTTCAACCTCTCATCTTCTTCTTGGCAAAAATGAAGCTCGTCTTTGCAACCTTCATGCTTGTTTGCCTTGTCCTCAGCTCCTCTTTCTTTGAGGCATCAATGGCTGGGTCTCCATTTTGTGACTCGAAGTGTGGGGTGAGATGTTCAAAAGCTGGATACAAGGAAAGGTGCTTGAAGTACTGTGGAATATGTTGTGAGAAATGTCACTGCGTTCCATCGGGGACTTATGGGAACAAGGACGAGTGCCCTTGCTATAGGGACCTCAAAAACTCCAAGGGCGAGGACAAGTGCCCTTAATTGATTCATTTTCTTTTGTGGTCATTTGTGATGGTGTTGGTATGCATTTGTGCCT…
UN015*	CCTAGTGGGAGGGGACACACTTCTCACTACCATGCCTGAGAGCATGGGGAGTGCTCATTTCACAAATCACAAAAGATAGTAGGAGATACCAAACCCTGAGATTTTTGGAGGAATTGCTTGGTAAAGTTCCAATCGTGCACATTGAAGATGTTTGTGAGGCACACATATTATGCATGGAGAAGCCTTCCATCAATGGCAGATTTCTATGTGTTAGTGCATATTTGTCTTCAGCAGAGATAGCATCTCACTGGGAAAAAAATTACCCAAGTCTCAAAATAGCTGAAGAGTTTGTGGAAGATTCAGGGAGAGACATTGGCTGGGGTTCCACAAAGCTGAAGAAAATTGGATTTGAGTACAAATTTGATGCCAAGGTGATATTAGATGACACTCTAAAGTGGG…
UN043	CGACCAGCACGGAAGTCACATGAAGGAACACGATATCGCCGATAAGATTTTGGGGCTGCTGATTGGTGGGCATGACACAGCCAGCGCTACCTGCACTTTTATTGTCAAGTATCTTGCCGAACTTCCTCATATTTATGACGAAGTCTACAAGGAGCAAATGGAGGTCCTAAGCGCAAAAGCTCCAGGGGAGTTGTTGAATTGGGATGACCTACAGAAGATGAAATACTCATGGAACGTAGCTCAGGAAGTTCTCAGATTGGCTCCACCTCTTCAAGGAGCTTTCAGGGAAGCCTTGTCTGACTTCGTCTTCAATGGTTTCACCATTCCAAAGGGCTGGAAGTTATATTGGAGCGCAAACTCAACACACAAGAACGCAGCTTACTTCCCGGAACCATTCAA…
UN054	GTTGCGGCAGGTGTCGGAGATGTTGTTGATGAAGGCGCGGAAGGCCAAGGCACATTTTAAAACATGAAGGAAAAGTGACTGCATTTCTCGGAAACGAAGGCAGAAAAAAGTGACTGTCAATCTCTTCAAAACGAAACCGCAAGGAAGCTGGGGGGTGGAGGAAATCCAATCATAGCTCGTCATGATCATAGTCATCCCAGTGACGGTGCCTTCGGTATCTGTCTCTATGCCTGTTCCGGTGACCTCGATCCCTATCTCTTCTCCTCCTTTCACCCTCTTCTCTTGCTCTTTGAGCTTCCTCTTCCTCTTGTGCTTTCCTCCTTTTTTCTGCTTCTTCAAGGGCATCCTTTTCGACCTCTCTATTGGCGAAAACTTCCTCGACCACTTGTTTTGCATAAT…
UN368	GGAACGATAGTATGTGGACCAGACTGAACCGCTGAGAATTCCGGGTTGCAAGCCCGTTCAGCCCGAAGACGTGGTTGACCCGATGCTGGACCGGATTGACCAACAATATTTGGAATATGTAAGGATAGGTACTAATTTCCCGAAGAGTGATGGGATTTTGATGAACACATGGGAAGACTTGGAGCACAAAACAATAGGTGCGTTACGGGATGAGGGACTCTTGGGCAGAGTGGTTAAGGTGCCAGTTTATCCCATTGGACCATTGACGAGGCAGGTCCAATCAGCCGGTTCAACCTCAACCGGTATAAGGGATGAAGGCTTGTTTAATTGGCTAGACAAGCAACCTTGTGAATCTGTGATATTTGTGTCATTAGGGAGTGGAGGGACTGTGTCCTTGGA…
UN422	GACAAAAAATTGAGTTTTATTTGATAGAAAAGGAGTTAAGAGCACACATTGGAAGGAAACTTATTTAGATACTACACTATTTTACATACAAGATACAAGGCTAATTTGCATACTGAACCTCCAAGCCCAAGTAGATATATACCACGCACAGCCGTGGTTAAATATATCATGGATAAGGAACTTGTGTCTCCGTTTGAAGATTGCAGGTAGCTTTGCCAATATCCCTGATAAAATCATCAAGATTTGTATCAAATGAACCTCCTTTTGCAATCGCTCGGTGACACAAATCTCCGAGCTCTTTCGCTCTTCTCCTCATTTCAATCCCATCACTGCTTTCAGGATCCATAAATCTCTTCACAAGCTCAGCAACCTCTTCTCTTGTCATCAACTTTTCATCAT…
UN459	GATCATACCAACTTCGAAATCGAGCCGTCGTTCGGAGTTGAGGCTTATGAGCTCTACCCTGATGTGAAGTACACCACCGTGGATGAGTACCTTGATCAATTTGTTTGAAGAGATTAAGATCACAGGACTTCTGCTAATATGTGTGCTAAATATCTCAGAAAAAATAACTTTAAATGTCGTTAATGTTGTTTGAGCGGAAGAGTGTGTGCGACGAGAACAAAATTTACAGAGTTTTATTGTAATTTCCATGTTTTTCCTGCACATTTGTGGTTGGTTTTGATTTTTAGAGATGTCAAAACACTTTGAGAATTGCCTAGTGTATATCACGTCATGGTGATACGAAATATAAAAATAAGATGATAG
UN481	GCATAATCTTATTGGTTGGAATTAAGCTGATGGTCGACGTTACATCAACATTACATCCGAATAGTTTGATGCTTTCTTAAAACTCTCAAAAGAGAGCACCAAAATCCCACGAGGTGGCCAAACTAAGTAACAGAAAACCATATCGCGGAGTTGGTTAAGAAGGGTTTATTCTTGCACACGACTCCTCTCGAAATCCAAATGCCAAATGCGAACCCAAAACTTGCACAGTTATGTAATGCTACTAACAAAGTTGACCAAGTTTCTGGTGGACGAACCGGTCTCTCCCAAAGCAGCCGAAGCCATCTCCCCAAGTTTCTTGGCACCTCTCTCTAAGCACTCTTCCTCCTTCCGACTCCATCAACTCCCTCACTCTCCTCTCCACTTCTTCCCCGCTCACGA…
UN499	CCCAATCATTGCATCTGGTGCTGGACAGTAGAAAGTTGGGATCGATATCCTCTCCGAATTACAATTTACCACAGCCCTATGCAGCACACTCTTGTACCTACTGTTGCTAATTACCTGCATCATATCACCAATATTGACAATGAAAGTGTTGGGAATGGGGTTGACAGCAACCCACTTGCCATTTCTAAGGACCTGCAACCCAGGCACCTCATCTTGGAGAAGGATGGTAATTAGGTTAGCGTCAGTATGTCCAGGCAATCCATAAGTCAGCTCTGGCTGTGGACATGGTGGATAGTAATTCAAAGCCATATGCTGTCC
UN504*	GGCCATTAATTCGAAGTTCATAAATCTAAGTAAACAAAGAACAAGAACGAAAAAAGTTGATAAATTTACATTTTCACAACCCAAACATCATATTTCATAGAATCAAAATCTTACTCCCCAAGCATCAATCTACGCCCTCGGCTTCATCACAATGGGGGAGTGCTTCAGGATGGGCAGGCTGAATTGGCCACCTTTCTCCGAGGGGGCGAGCTTGGACTGGCCTGGCGGAGGCAGAAGCTCGAAGTTCTGGACTAAACGTCCAATTGGAATGCCCAGGATTGGCAGTGCCAAAATAATCCCAGGACAACTTCTCCTCCCAACACCAAACGGGAGATACCTGAAGTCGTTCCCGTTAGCCTCCACCTTCGACTCCTCCTCCAAAAACCTCTCGGG
UN511	CCCTGTTTGTCCATGCCAAAGCCTACGGTGTTACCGTCTCCGACATAAATGAATCTGGCTATGTTCCTCGTGATGTTGTCCACTCTTTTTTTCCTCTAAATGGTGCTAAAAACTACGAGGGAACCTCTAAGCCGCTGCTTGCAGTGCAAGTAACTGAGCTTGGGGATGGTATTTTCATAGGCTGCACCGTCAACCACACAGTTGTTGATGGCACTTCCTTTTGGCACTTCTTTAACTCTTGGTCCGAAATTTCTCGGGGTTTTGATTTTGTCTCAAAACCACCTGTTCTTAAGCGTTGGCTTCTCGATGGTACTATTAGTCCCATTCGAATTCCATTCTCAAAAATTGAGGATCAAGTCTCCGATAAATACATCGGAAATATCCGAGTACCATTACTAA…
UN514*	GAAATGAAAAATATAAATAATTTGCATTAAAAGCAACGTACTGAGGTTGTTGCTATTTTTCTTTTTGGGTATAGGAGTTTCTATATGGACATAATGAAACTGCTCTTCTTTATTTAAATCCAAAAACTTACTGCTCAGATTGTTGAAAAAAATCGTAAAAAGTTGGTACTAAAAGCTACGTCCTGCTCTTCTTCCCTATAAAGAATGGCAGCACAGCTGAATATCGTAACATACCTGCAACTTTAAAACAAGCGTACGGAACTTGTAGTGTTCCTACAAGCCTTCCCGATAAAGCAAACATCGCATCAATGAGGAGCCATGATACAATTTCATATTTTCGACCGCACTTTCTCGATGAGCTCTCTTCTGAGGATTTTGCCCGATGCTGACT
Aroma production
UN046*	GAAAAAGCACTTCAATTAATAATTTGGTAGTTCCAAAAAGCCCAAGACACCTACAACATAAGTTAAGGGAACCTCAGATCCATTACAAAGAACCTAAAACTCCCAAAATGCTCACCGACTTCGGCAACTTTCAGAATCACAGCTTTTTATTGTACCAGAAGACACCTTTCTTGGCACCCTCATCGGGCTCGACGTAGATACACTCCTTCGCCTCTCTAAACATTGCCTTGTAAACCGGAGTCCCGTCGAACTGATAGTACTCGCCCAATATCGGCTTGATTGCCTTGGTCGCCTCCATTGCGTGATAGTGAGGCATGGTTGAGAACAAATGGTGCGCAACGTGAGTGTCTGTGATGTTGTGGAAAACCTTGTTCAGGATTCCGTAGTCTCTGTCAACGG…
UN114	CCAGGAAACCCATACCGGCTTCAACCTCGTTGGGTTCTCCAACTTCGTCCGGACCATCCCCCGGTCCGACCGGTTCAGGGTCCACCGGTTCCACCACGTCGAGTTCTGGTGCACCGACGCCACCAACGCCGCCCTCCGATTCTCCTGGGGACTCGGCATGCCCATGGTAGCTAAGTCCGACCTCTCCACCGGCAATCAAACCCATGCCTCCTACCTTTACCC
UN118*	CCATGCCCATTCAGGAATGGAGAATGCGCAGCGGAGCTGCAACGAGCGTCGGCTCTGTACAACCCGCAACTCATTCAGATGCTGAGATCAGTCAACAGCCAACTCGGTTCTGATGTCTTTGTTGCTGCAAACGTACAGGAGACCCGCAATGACTTCATCAGGAACCCTCAAGCATTTGGATTTACTACATCAAAGGTTGCATGCTGTGGGCAAGGACCTTACAATGGCTTGGGGCTGTGCACAAGAGCTTCCAATTTGTGCCCGAACCGCGACCTATATGCTTTCTGGGATGCATTTCATCCGTCCGAAAAGGGGAACAGACTGATCGTTGAGAATATTTTGACAGGGGATGAAAAGTACATGTACCCCATGAATCTCAGCACCATCTTGGCTTTGGAT…
UN244*	GGATCAAACTCTAACAATTGTTTTATTAAGGGCAAAATAAAATATATATATAGATAGATAGAGCTTTTACATCATCACCCTCAAATATCATCATCAAATTTAAATGGAGATGCTGTTTGGAACTCCCATTCCTGTGACACCGGATGTTGAGAATGGCTTCAAAAGCTCATATGGAACGACGCCTGCTCCAACTCTGTTTTTCAGTTTCAAATTGGTATTCCTCTCATCAATAATTCCTTCTAGCCTCTTCAAATTGCCATTGAATTTCTCATATGCGG
UN316*	GTACAGAGCGATCCGAATCTATAAAAAGAGAAACTCAAAAGATTTGGTGTCTATTTATAGAAACAGAATTGCACTTAATTGAAAAAAAAGAAGGGAAAAACAAATAAATTATAGAAACCTAATATAAATTTAAAAAGTTCAGGCAGAAAACTATGGAGCTAAGATGTCTCCTTGTTCCTCGAAAATGCAAGACTTGTACGCTATTGCAAGATGTCAACATATGCTAAAAGGCAGTTCACAACAGCTTAAGGTTACCCTATTTGTCCACTTTTGGCACTTCCATCTGTTTCGAACAAGATCGTCTTCCGGGCACCATATCAGCAAACAAGCCGACTAAAAGAGAAGTAATTAACCGAACGTGCGATTTGCACCCACTACTCTAGATGCATCAAAGGAGAA…
UN346	AGCACGAAGGTAACAATTCACATTATTTCTCAATTTACACTTCCATCATTCTTTAGTATTGTTAGTATACTACTGATCGAAACCGACATGCTCAACCAACAAGAAGTGCATGGAATGCAGGATTTTCGACTAATTCCCCATATCGCGAATTTAAAAGTTACACCAAAGGAACTAAATTTCACAGTGAAATACTGAAGAACAAGCAGCAAGTACAAAACCCCACCAAAAAATATGAAAAAACAGAGTACAAATGGAGGTTCAACACTCACCGCCACCGGAATTATCCAAAAATCCAATCACTTGGTCTTCACATCCACTCCATTCGTGCCGGCAATGATCACCGCCGTCGCCATGTCCAAGAACAACCCATGTTCCACAACACCTTCGAATTTCAAAATC…
UN393	CCACCTCGGTTGATAAATGGAATATACAAATTTGAATTTCTTGATTGAAGTGAAGGAGTTCTACTTGTATCAGCAAAATAATAAAGAAAGCATACCGTCACTAGCTCGATACTATATGGATTAAGACCAGCTAGAGTTTGCCTGGAAAATTCTTCGTCTCTAAACCAAGCAAATTTATCACCTGCAATAGAAGACAAGTGATATACAGGGTGAAGCCAACAATTTCGTGGTCTGTTTTCCTCAAGAGGGAATCATCATTCAGAAATTTTTGCTTGATCGTGATCTATACACAGGGAGAGAGGGAGGGAGGCGTACGGTCAACTATTTCAGGCGTCTCAAAGAGCAGAAGATCGTCTCCCCCCTCTGTAATAGTCTTGACTAGCCTTGGGAGGATTGTCT…
UN414	CAAAACTCAAAAAAGGCGAATTTTAAGCCCAGGAACGAATAAAACTGCCTAACATGCGCCCACAGTTAACATCACCCCACGCCCACAGTTCTTCTGTTTCTACGAGTAGTGATCGGAGGCTGAGCGCTCTGGTACGACACCTCGCTGCCGAAGAAGATCAATCGTCCTCCGCCATGGATGCTCACAACAACTCCATCTCTGCCTCGCCAGCTTCCGCCCACGCCAATTCCGTCTTCGCTCACGTCGTTCGCGCTCCCGAGGATCCAATCCTTGGGGTACTCTCTCTCTCAAAGTGTTCGATCTTTGCTTGAATCAGTTTATGAGATTTCAGGTTTTCGCGTAATTTGTAGTGATGGAGTTTTGATTTCTGTTGCGATTAAGCTGAACAGTTTTCAAATT…
UN474*	GAAAACACAATATAAAAACATTTATACCAACACACTTAACTTGTTATTTATTTGTCACATAAAATTGACGCTTGATGACACTCTTTATTTTAAATATATGGAATATAATAGTGCAGCCACCTATATTAACTAGAGCGTGTATCCACATAATTTTATTGATACACTACTAATAAGAAGGTTTATGTTCAAGGGTAAACTTCAATAAAAAACCTAAAACCGAGTGTATGAGTGATGTTATAGTGAGTGAATCCAGCAGCGAAAAAAATCTTCTCCCATTCTGATTTGCTACCCTCTTTGCCAGGGAGGATGGACATCATCAACATATCGAACATGAGCTGAGTTTCAATTGATTTCTTATCCATCATCTTCTTCTTGTTATCCACATATCCCACAACTATG…
UN510*	GTAATGTTAACCAGCAACAACAACCAAATCAATGACAAAAAAAGAACTCGACGCATAAGTTAACAATGGAAAGCGTTGAAGTTAATGGAAAGTTTTTTATGTCACTAGAACTGCAAATTAGTAGCTGTGCCACATCGATATATCACTTCAGGAGTAATTTTAATCGTGTTATGTTTATCCTTGTGGTTTTCTATACTAATAAATTTACGCAAATGATCAATATTTATTACT
UN536	GAATTAGTAAACAAAAATTTCAAATTTTCGAAATTGCATCGATGAAGAGCATACATTGATGGATTTAACAGTTGAACATACATCGAAAAATTATTACAGAATTCTCCCACGTATTAAATTCTAGGGATTACGTGGGCTTGCAATGGATTCTTCATCACCACAGTAGCCTCCTGCTTCTCCGACAGGTCCACGTCATCTCCCTCCACAGCTCTCCACTCAAATTTCCACACCAAATTCGCCACAAAGTACTCCAGGTGAAGCACCGCCAATCCCGACGCAGGACAGATCCTCCTCCCTGCCCCAAACGGCATCATCTTAATCTCCCTGCTCCCCGTCAAATCGAACCTTTCTTCTCCTCCGCCGCTGCTCAAGAACCTCTCCGGCTTGAACTCCATGGGA…
UN599	GGTCATCCTAGCTGAATTTGAGACATTTAATTTGTTGAACACATATGCACCAAACAATGGTTGGAAGGAGGAAGAAAACTCATTCCCAAGGAGAAGAAAATGGGATAAAAGGATTTTAGAGTTTGTTCTGCAATCTTCGGATAAGCCTCTTATATGGTGCGGTGATCTGAATGTTAGTCATGAAGAGATTGATGTGAGTCATCCAGATTTTTTCAGTGCAGCAAAGGTTAATGGTTATGTTCCTCCAAATAAAGAGGATTGTGGGCAGCCTGGATTTACCTTGAATGAGAGGAAGCGTTTTGGTAACATTTTGAAAGAGGGAAAGTTAATAGATGCATACCGGCACCTTCACAAGGAGAAGGACATGGAGCGTGGCTTCTCCTGGTCTGGAAACCCCAT…
Stress response
UN029	GACCATGAGGGCATAATCAAACAGTAAATCTAAGAGAAATAATTTACAAAGTAAATAGGCTTTCATTGGCTAAATACAGCGATACGGTGTTCAACAAAATGACCAAGAAAACATCCTACATCTTGGATTTTAAAATCCCATAAAAGTAAACGATTTCAAACCTTAAACTTAAATACACATTCACTAGCTTCACCTCCACCACTTCCTTCAAAGCACACATCTTGGATCGACGAGAACCGCTTAATCAACTTCTTCGATCTTGGGACCAGCACTGCTGCCACCAGCAGGAGGAACATCTTCATCCATGCCGCCACCGACATCAGGTCCACCAGCACCACCCTGGTACATCTTGGCAATGATCGGATTGCAGATGCTCTCCAGCTCCTTCATCTTGTCCTC…
UN044	AGGAAAGATCTTTGAATTCTGGCTGCCAATGAAAAATTTTCATCATCCCACAAGGAACATAAACGGTTTAATCAAGTTTAAAGAACAAACAGGGACTGCAACTGCTTAATGTTTTCTTAATTAACACCATGCCTCCATCCTTAACAAGTCTTGAAATCACACTGATATGATAAACATACACAAAAGCAAGCTTGAACTTTTTATTCCAGTTTGATACACAAAAGGCAAGCATATGTTGAAATCTTCACATCTCAGCAACTTATGCGACTCCCAACAGGGTCTTGATGTCATGCTCGATGCTAAGGGGGGGAGTGGTTGGGTAATAGCGGTGAGACGCTTTGCCTTCTTTGTCAACTAGAAACTTGGTAAAGTTCCACTGAATATCGTCTCCAAAGAATC…
UN055	CCGGTGTGGCTGCTGCCGGCGCTTTTGCCTTGCATGAGAAGCACAATGAAAAGAAAGACCCAGAGCATGCCCACAGGCACAAGATAGAAGAGGAGATTGCTGCAGCAGCTGCAGTTGGTTCGGGTGGATTTGCCTTCCATGAGCATCATGAGAAGAAAGAGACAAAGGAAGAAGAGGAAGAGGCTTATGGAAAGAAGAAGCACCACCACTTCTAGATCTATGTGGATTGTGGAACATCATCTTTTGACTACATATGCAATGTTGTGTTTTTATTAGTTATCATGTGGTGTGATCAGTGAGAGTGTGATGCTTAATCTCAACAATATCGCTACAATAGTTGAGTGGTTAAATGTCCTTTTCAATTAATGGGTGCCATCTGGTTTTCTTTTAGCATGCCAT…
UN112*	CGAGTCAGGGAGAACGGCATCAGTGAGCTTGTGGTTGCCCTTTGTGGTGGCGGAGCAGTTCTGAGCAGCTCCCAACCTGTGCCTTGTGAACTCTTCCCAGCTCCAATCAGCAAACCGATTGAGAGCAAGAGTGTACGGCAAGCCCTTCTTATTGGTAGATCGAATCAGCTTCTTATTCTCCGAGAAAATCGCATACCGCAGCTTCATCTCCTCCGCGCTCTCGTACTTCTTCCCGTACCTGTGAGCGAAGCGGGCGAAGGAGAGGACGTGGCGGCAGTTGCCGAGGACTTGGACGACTTGCTCCTCC
UN137	GGCACTCATTTCCTCCTTTGTTAAGCTTGTTTCGTGGTACGACAACGAGTGGGGATACAGCAACCGAGTTTTGGACCTCATAGAGCACATGGCGTTAGTGGCAGCATAGGATACCTATGATAGGTATCTGTTGTCAACGAGTGCCTCCGAAATTTTATCACTTTGATGCTTGCTATGAGTTTGGTTGAAGAGTAGTTTATACACATGATCTCGTTTTTATTGAAGTGGAGATTTAGACGGACGTCGCATATTTCTACTTGAAAATAATGGAAATTTTGATTTGTATGATGAGCTCCCAGGTTGTTTGGGCTAAATACATCATCTATTTGTACCCGCATTATAATATACCTCTCTGTTGAAGGG
UN180	GGTGTGACGGCGGTCATAGCAAAGAGCTTTGAGCGCATTCACCGTAGTAATCTTGTTGGCATGGGCATCATTCCACTATGTTTCAAGACTGGGGAGGATGCCGACTCTCTTGGTTTAACTGGGGAGGAACGCTACACCATCGATCTTCCAAGCAGTGTTAGTGAAATTAGACCCGGTCAGGATATCACAGTGGTGACAGATAACGGCAAGTCCTTCATATGTACGCTACGTTTCGATACAGAGGTAACATGCTGCATCATCTTTTACTTCTTTCTATCTTCATTGCCTGTCAAGTTCGTGTTGCTTCAGAGTTCCCTTGTTTCGTCTTTCGTGCAGGTCGAGCTGG
UN254	GAAACGAGAGAGAAACGAGCGAGGTAATATTATTAGTTTCGTCAGCTGAAGTTTCTCAAATATCACATTCAAAACCTGCTTGCTGCAACACCTAAATTTTTCTCCCGATATCTTTTCGAGGGGTTTAAGATTCGAATTTGAGATTAACTTATGCTTTTAAATCTCCCTGTTTCTCTTCTATGTGACAACTATCTCTTTTCTACCACTCAAATAGTAGACAGACAGATTAGCATACACTATTGTATTCCTCATAGTTCATCCTTCGAATCGTCTGCGCTGCTGCTGCTCCCTTGGCTTTCTGTTGCAGCAGACCCCTCAGATTTTGGCGTTGATGCTGGCTTCTGGAGCTTGAAAGGGATTGATGCGTTTTTCTTGAGAAACTTGTAGAATGCCACCACT…
UN403*	ATTCACCTTTTAAAGAACCAGAAGCGTTGCATGGAGGAAAAAACAACTCCTTGCACTTCTGGAGCTCGTGAATGGCAACGAAGAGAAGATTTTCAAAGCTCTCGATCAAGATCTTGGCAAGCACCCAGTTGAATCTTATCGGGATGAAGTTGGAGTTGTGAAAAAATCACTCAACCATACTTTGAGCAATTTGGAGAAATGGGCTGCTCCTAAAAAGGCACGATTGCCGTTGCTTTTGTTTCCGACGAGCGGGGAGGTGCTGCCGGAACCCCTCGGCGTAGTTCTCATATTTGCATCTTGGAACTTCCCAATATCCTTGGCGTTGGACCCTGTGATCGGAGCAATAGCTGCAGGGAACGTAGTGGTTCTAAAACCTTCTGAGCAAGCACCGGCGTGCTC…
UN523	AAGGTATTTTACACGGTAGATAATCCAACAAAGAGTTGGAAAGGGGGAAAAGGTTACATATCAAAGGACATTGCAGTTAAAGGCTTACCTGCTCCTGGTGAAGATACTCTTGTCCTGGTATGCGGTCCTCCTGGGATGATGAAACATATATCTGGTGACAAGGCTAAAGACTGGTCTCAAGGAGAGGTCACTGGCATACTAAAAGAACTTGGATACACTGAAGAAATGGTTTACAAATTTTGATTCAGCGAAGACGATTTAGCTTTTAAGAACCAATCACTAGGCTTTAATTCAAGTTTTGTGCAATAAAATGTGTTCTTAGGAAGCATACGCAACTCGTACTCGAATTTGAACTCTTTTATTTAATAAATTTGGGAAGAATACTGAATAGGATGTAGT…
UN567	GTGACTCTAAATCATGCTGTCTTTCATACCACTTGAAAAGATGAATACAAATACAAGGCTTATCCGGATTGGATTGGCTTACCGCCGGATTAATAAAGGAACGATGGCAACCAATTTTAATCACTGGGGCAATTGAACTTAAGGGAAAATACAAGAATGTAATTATATCACAGACAATTGCTGAATGTTGGTAATTTGCTAGGCAATGTAATACATTGGGTTTGGAAGTTTAAAGGATCGTTGAGCAATTGCAAAACCCACCAAATCACTCCATTGATCTCCCGAGCTCCCATGAATTCCATAACCTTCATTTATCAAGTCCGATCTCTTCTGGGATTTGAAAACCGTGGCAAGTGTTCCTTGATCAGAACGTCCTCTCAGCAGCAGCCTCTCCCAATT…
UN586	ATCCTATACAACAACTGCGCACCCTTATCAAGCATCCTCCACCGTACGAATCACCATAACCGCAGATCAAAGCTATGGCTCCGATTGCAGTCGGCGATGTTATTCCGGACGGCACACTCTCCTACTTCGACGAGGAAGACAAGGTCCAATCCGTCAGCGTCCACTCCCTCGCCGCCGGCAAAAAAGTCATCCTCTTCGGCGTCCCCGGTGCCTTCACCCCCACTTGCAGTTTGAAGCATGTGCCTGGATTCATTGAGAAAGCAGATGAGCTTAAATCGAAGGGTGTTGAGAAAATTCTGTGTCTTAGCGTGAATGATCCCTTTGTGATGAAGGCTTGGTCAAAAACATACCCCGATAACAAGGATGTTCTTTTCCTTGCTGATGGCTCAGCGAAATACA…
UN609	AGCAGACAGGCAAAGGAACGGATATGCAAATTAATCCAATCTGGTGTTGAAAGTGGTGCCAAGCTATTGCTTGATGGCAGAAGTATAGCGGTCCCGGGATATGAGCATGGCAATTTCATTGGTCCTACAATCATATCAAATGTTACAGCTGACATGGAGTGCTACAAGGAAGAGATTTTTGGTCCTGTTCTTCTCTGCATGGAGGCGGACAGCTTAGACGAGGCAATAAGCATTGTTAACAGAAACAAATATGGCAATGGAGCTTCTATATTTACTACGTCCGGGGTAGCCGCAAGGAAGTTTCAGACTGAGATTGAGGCTGGACAGGTTGGAATCAATGTTCCTATTCCAGTTCCCTTGCCCTTTTTCTCTTTTACTGGCAACAAGGCATCTTTTGCA…
Transcription
UN041	CCGCCCGTGAGATCATACTGGAAAAACTGCCTCCAATCGAAGAAAACCGAGGCGGAGGCAGCCGGCATCTACGTGAAGATAAGCATGGATGGAGCTCCTTATCTAAGAAAGATTGATTTGAAGGTGTACAGAGGATATCCTGAGCTGCTTAAAGCATTGGAAGAGATGTTCAAGTTCAAGGTTGGTGATTACTGTGAGAAGAAATTAGGGTATAATAACCGATCAGAATTTGTGCCTACTTATGAAGACAAAGATGGAGATTGGATGCTACTTGGAGATGTTCCATGGGAGATGTTCATCGTTTCGTGCAAGAGGTTGAGAATCATGAAAGGTTCGGAAGCGAAAGGGTTAGGCTGCTGCACGCCGTGATCAAAGAACAATTAGACAAAATCGGAAGAT…
UN212	CCCCGAGAGGCAGCGGAGAGTGCGAATAGACAGGAACGTTGGTTCAAACAAGAGATACGACATCCCTCCCGACCAGTGACTACTTAGCACATCTGACTTGACACAAAAAGCTTCCAGAGTTTTTGAGAACCTTCTCAAATCTATCGTCTTCGCATCGCGCGCCCACGACCGCCTCCACGCCCTCGACCTCCCATGGCACTTGCAGCAGCTTCTCCCTGTGCACTCTCGGACTGCTTTGGGTTTTTTACTGTCTCGTCGACACTTAAAACAAGGCAAGCAGTCTCGGTAGCAGCATTTATAGCATTGATCTTCACAACAGCTGGCTCCCAGACAAAGTTAGCAAATGAATCCGCAATTCCACCTGTGTTGATGTCGACTCCATAAAGTGCACCCTCGCCA…
UN386	CCTTGCTGAGTCTGATTATTGAGATTGAGTTCTGGCGCCGAGTTGAGCCCGGCGAGAGTCGCCCAGTCGAAATTCCCGGAACCGGTGTTCTGAAAATTAATCTTGCTGTCCTCCTGCTGCTGCAGCAGCGTCTTGAGCGAGTTTATCCGGGGCAGGGTGAAGTTCCGATCGTCAATATCCGGCAACCACTCGAGCACGTCGTCGAGCTGAGAAGAGCACGATGACGACGAGCCGTTGCTGTGCTCTTTGCTCGAAACGCTCGTAACGGGCTTCTGTGCTGCCGCTGCCGCTGCTGAGCTGCTGCTCTTCTTGTAAATACGACACAAAACCCATTCATCCAACTTGGAGCTGCCATTTTTGCGAGAGGGCTCGATGAGGCGATACTCGTGCATAATCCAG…
UN490*	AAAGACTCCTCATCAACTATTATTTTTATGTTTCACATGCCTACTCACAATGTTTGCGCATTGTTACTAATTTTACGTCTGCTCAATTGTTTTTCGACTGTTTCAGTCATTTGTTCTACATTAGCCATTGCATTACAATTTCAATGACCAAACCCACACATTCGCACTAAACAAATTAACTGAATAAACAAACTCATTTGTTGGTGGTTTGCAGTTGCAATTACCGATCAATCGATCATTTTGTAATAACAATTGCAGGTCCACATTAACCACCCATAGTACATTATTTTAAGGTCATAAATGGTGATCAGCTAACCAATAGTTGCTCGCCAAGTGGTAGCAGATACGAGGTATTGTTCTTTTGCCTTTTATGACGCACATTTGCTTGATGATCATGAT…
UN496*	TGGTTGTTTGGGTTTTTTGAGAAAGAAAATCAGAGAACAAGCAGTTGAAAGAGTTGAGTGGCAACTGAGAGTCCATAAGTATTTAATCATGGGGAGAGGTAGAGTTCAGCTTAAGCGCATAGAGAACAAGATCAACAGGCAGGTGACTTTTTCCAAAAGAAGAACTGGGCTGCTGAAGAAGGCTCATGAGATCTCTGTCTTGTGTGATGCTCAGGTTGCTTTGATTGTCTTCTCCAACAAGGGCAAGCTCTTTGAGTACGCCACAGATTCATGCATGGAGCAAATCCTCGAACACTATGAAAGATACTCTTACGCCGAAAGACAGCTAGTCGAACCAGATTTTGAGTCACAGGGTAACTGGACCTTTGAATATTCCAGACTAAAGGCTAAGGCTGAGGT…
UN575	AGTTGGATGCAAGAGGGCGGGCACACTATCCTCGTCAGACCTACAATCTTATGAAGGGAAACATAAGTGGTACACAACAAGTTAAGATGTCCTAATAACAAGTCGTAGCAAGAAAATATACAAAAGCTGCAGATTGGTACTAAACAAAATATTCATAAGTCACATTAAGGGTTCCCCCATTCCACAACTATTCCTTCACTCTAAGCGAACCGAGTCTCGAACTTCAAACTGATGCCCATGCTGAACAGCTCCTGGCACAGTAACTTCGCTCCGTACGGGACGTTTGCCTTGACAAGATCATCTGCAGAATTGCAATTCCGGCAGTAGGGACCCCTGATCTTCCGTCCTCCTTCAACCGATCGTTGGATCACATTAGCTACATGTTCGCATTTCTGGCAG…
UN596*	GTAAGAATAATATAGCCATGACCATTAATAAGCAGCTTTTTATCTGCAGGTAAATTATATGTATACAAATTTTTGGACACAAATGTTGTAACTGAAAACTAAAGGGAAAAGAAAGAAAACAAGGTGGAACACAGGAATTTCGGACAAATTGGTATAATACCACCACAACATCCTATCAATCCACACAATCAAGGAGAAATTTCGAGCCTCGATTCGAAACAAAAACCAGTAAAGAGCTGAAGTGGGAACCTCTTTGTTACAGGGCACTTCTGTGACCATCTCCAATGCCTCAGGTTCATGTCAAATACAAGAAGAGTTGGAGCTCCGTAGCTCTGTATGTATATGAGATCATCTGTGCCGCTGCTGGCAAAAACATCATCAAACTCCCCAAACCCTTGG…
UN600*	GCTGAAACCACAGGAATTGGTCAAATACATTAAACGGTCATATATATTCTGTTTTTACATATTAAAATTCCAGCTAGGCTACTTTGGAATTTGTGCATTGCTTAAAATAAGGCAAAGTGATCTTGAAAAAGATATGGTCTTTTTTTGGTCGGTTGCTATCTGTCGTTCTCTGTGTTCTTCTGCATCCACTGGTATTCCTTGCTTCCCTTTATTCATGTTCCAAGCTCCGACTCCAATGAAACTGATTAAAAAAACAACCTTAAGCCTTTGATTCATTTTCCATGTTTGGGTTTTCTTTTTCTCTGTTTTGGCTGCTTTCTTGTTGTCTCCTCACAAACATATGCTGGTATGCTTGAGGGGCAGCTTTTTTGCCTTGTAATTAATTGAAAGAACACAAGT…
Metabolism
UN018*	GGCCGCCCGGGCAGGTCCTCCAGCTTCTCAAGGATGGTGAATGGGTGGATGTCCCCCCAATGCACCACTCCATTGTCATAAACTTAGGTGACCAGATTGAGGTGATCACCAATGGGAAGTACAAAAGTGTGATGCACCGGGTGATAGCTCAGTCGGATGGGACCAGAATGGTCGATAGCCTCGTTCTACAACCCAGGCAACGACTCATTCATCAGCCCAGCACCGGCAGTGCTTGAGAAGAAAACTGAGGACGCCCCAACTTATCCCAAGTTTGTGTTTGATGACTACATGAAGCTGTATTCTGGACCTGCCCGGGCGGCCGCTCG
UN030	CGGTAAATGACCATTTCTTCATTTATCATTGATTAAGTATACAAAGCGTTAAGACAAATTGGTAGATGAGCATTTCTTCATTTATCATCGATTGAAGTACACCAATCAAATTGGTGTCTTTGAAAATAACAGTAGGCACAGCCTCAAAAATACAAAATATAAAGGAAAAATAAACAAACAAAAATAAAAGATAAAACGCCCTCCGCATTAAAAACCCTACTAAATATTTCATCACACAGTTATTAAACCAATAAAAACATGATTTCTCATCCATTTGATCGCAATAGAACGTGAGGATTCAACCCTCCCTTCCTCTCAAACGATTCACTTGGCACTGGCGAGCTGGGTGCGGAGGAGCTTGGCGGCAGCAACCATGTTGCTGAGCGCCGGCTTCACTTC…
UN070	CCGGCGACGGCGGGGTCATGGAGGGCGTGGTCGGGACGCCGTACTACGTTGCGCCGGAGGTGCTGATGGGCAGGGAGTATGATGAAAAGATCGATGTTTGGAGCGCCGGCGTGATGATGTACATAATGCTCGGCGGGATTCCGCCGTTTTGCGGCGAGTCGGCGACGGAGATCTTCCAGGCGGTTTTGCGAGGGAATTTGAGATTTCCGCCGAAGGTCTTCCGATCCGTATCGCCGGCGGCGAAGGATCTGTTGAGGAAGATGATTTCCAGAGACGTTTCCCGAAGACTTTCTGCTGACCAGGCACTTAGGCACCCATGGATCTTAAGTGGTGGAGAAGCAAATCCAATTGACTAAAATCTGACTTTTGGGTCAGTCATGTCAATGAACCAAATCCAAG…
UN166	CCAGAATTTCATTCAATTCAGCAATAAGTTGCTGCACCTCGGGAATGAAATCAATTAGACCTTCAGGGATAAGTATGACACCATAGTTATAACCAAGGTCAGCACGCTTCAGGATTACATTCACGATGTGGTCAGTGACATTTTTCAGTGTCAGCTTCTTTGCAGCAACCTCTTCTCCAATAATTGTAATGTTTGGATGAGTTTGCAAAGCACATTCTAATGTAATGTGTGAAGCTGCACGTCCCATAAGTCGTACAAAATGATAATATTTTCCGGTTGACCGGGCATCTGTCATGACATTGCCAATCATTTCTGCATATATCTTGCAAGCAGTGTCAAATCCGAAACTTATGGGGACCTCTTTGCATTTCAGGTCACCGTCAATGGTTTTGGGGCAAC…
UN437*	GGGAGCCTAAACTATTAACATTCACCAGGGAGAATAAAAGCCTAAAAATTGCTCATAGGACCATAGTTTTTGGTACAATGTAACGCAGTGATATACTGCTGTTCTTCTGATTTGGATTATACGATTTTGCGTCGTTTCTCCAGATATACGTATAGCAGACAAGTTTAATATATACAAATACAACCATAAATTCTAATTGAAAAATACAACCATAAATTCTAATTGAAATTAAGCGGTTTGCAAGCGGATGACTGATTCCGAATTTGTAGGTATGGACTCAGCAGCTTCTTCTTCAGTAGGTAGATCATCCGACTCCAGTTGTGGTTGATTAAGGCTCCCAACAAACTCAGAAAATGAAGGAAAATGTTCAGGTGAGAAGAAATCCGCTCCCATTCTCTG…
UN542	CCGCGGATTGCTCAGCGGTAGTTTCGGTAGATGGGACTGTACATGCAACTCTCGGCATACTTCAGAAGATTCTCAGGACGAGGGAGACGCGTAGCCACCCCAAGGTCATATGCTTTTGCAGCTACATTAGCAGCTATTTGGGCAGAAATCTTTCTGATGTTTGACAATGGTGGATAAATCAGCCCCTGTGCAAAATTCTCCTCAGAAACTAGCCCCGCCAAAGCTTCCGAGGCTGCCAGAAGCATGTCATCGTGAACACGGATTGCTCCAGAGATAACCAAACC
Transport
UN199*	ACCCACAACTCTTTATCATTTTTATCTGGTATAACAAATGAGGGAAAATTATACAATGATCCTTTCTACAAGGATCAACCGTACCAATTCCAAAACAAGTAAAAAAAATGTAAATTCCAACCCAAAGTAAGAAAAAAAAACACCCCTCAAAACTTTTAACCCAACATGGATCAAGTTAATTGTTCTTGGCAGCTGAACCCTGCTTCCCACCAACAAAAAAAAACTCGGTAATCACTTCAAGGGGCATACCTTTGGTCCCCGGAACTTTCAAAAAAATGAAAAAAAACCCTATGACGGACACAACTGCATACATGCCAAAAACCCC
UN302	CGCCTGGAAGAATATATTTCCACTGCAAATGCGGTCCACAAATTCCGTTCATATGGTAACATAAATTAAATGCCACAACAAGCATACAACGCATTTGAAAACTCAGGTTGCGGTTTCAGTCTGAATCCGAATCAAGATTCACAGACGATCTCACTGTCCTGCGACCGCCTTCAAGATATCCATCATCTTCATCACCGTCTTCTTTCTTCTCACTAATTATACCTTTCTTGATTAGTGCAACTTCAAGCGCCCTTGTGCTGAAATCATCTTTTGCTCCCACTTCTTGAAACCCAACCAACCTATCCACAGCAACTCCTTTTCTGAAGAGTATGACACAAGGCAAAGTTTTGATTCCGAGCTTGGTAACGAAAAAGGGCGCATTCTCAGCATCCAGCTTGA…
UN306	ATTCGATTGAAAAATGGGGCTTACGTTCACGAAGCTCTTCAGCCGGCTCTTTGCCAAGAAAGAGATGCGAATTCTGATGGTGGGTCTCGATGCCGCCGGTAAGACCACCATCTTGTACAAGCTCAAGCTCGGAGAAATCGTCACCACCATCCCCACCATTGGATTTAATGTGGAGACAGTAGAATACAAGAACATCAGCTTCACCGTCTGGGATGTCGGGGGTCAAGACAAAATCCGACCATTGTGGAGGCACTACTTCCAGAACACACAAGGTCTTATCTTTGTGGTTGATAGCAATGACAGGGATCGAGTTGTTGAGGCAAGGGATGAATTACACAGGATGTTGAATGAGGATGAACTAAGGGATGCTGTTCTGCTTGTATTTGCCAACAAACAAGA…
UN309	GGATGAAATCACTTGGTATATCTAGTAAGTCAACTTACAAAAAGATAAACTGAACCAAATGAATTTACCATTACACATTACTACTTAGTTTCACATATTTGCTAATAATCTGTGATCACGACGACACTCAGTAAAGAGAGTAATTCGACGACCATCTCTTGTAAATTTGTAATCGATGTCTCCCTGAAAGCCGAGGATATTAGAGCAGCATATACCCAACTGCCGGATTCACCCAAATTTTCCAGCTTCAATCTTCCTAATTGCTCTTTGACCGTGATATATAAACGCATCCACAAGTCCTGCAATGGTAAATATACCTCCAACTATGGCACAGATATGGGTCACGAAGTGTAAAAACGGTACATGTTCTTCTTTGAATGTGACCTTAATTGGAGAAAG…
Not annotated
UN376*	ACCAAATCCACAACCACAAAGAGAATGTACCGAACAATCTCGAATCGTATCTACATGCATTTTCACTACATAAAGTTGCTCGACACGCGAGCTTATGAATATAGATATGAACGGAAGAGTATTGGCATGTCCTTTCGACGCTAGCACACTTCAAGCACTTCCTTTAATATTGGCATGTCCATCGAAATCGATTGCAGAAACCTGTCCATATTCACCCTTGACATCCTTTTCAGTCTCCTCAAAATAGTCCTCTCGGGCATTGTCAGCTAACATCAGGGCAACCAACCAAAAGAGCGATGCGTCAAGGGACACAAAAGCACCACCACCAAGAAGACCGGTCTTAGCAGTTGGGCATTTTGTTTGGAGATTGCGATGAACCTTTCTTGAGTGATGAAGTTG…
UN525*	ATGTAACAAAATTCTAATGCCAATATATACCCAATGTTACATATTACAAGACATTAATCAAGAACAAATGAATAATAATCTCTCAAACTCGAGCGAGCATACACATACATATATTAATGATGTATATGTCACATACGAATATGTGCTTAATTTAATTAGGAGAATCGAGTGGTTGAGTATTCTTGGCTACTGCTTTTGCTGTTAGGGGGCTGCATCATCATCGTGTTCGTGTCCGTTGAGTTTGTTGAAGGAGAGAGCTCGCCGGCGCCAGCGGGTAAGTCAGAAAGAGCAGCGAGCATCCGGCGAATACTGACAGAGCGAGCTGGTTTGAAGCTGTGGGACCTCTTGGTGGTTTTGGAGAAGATGTTGGATGAGTTGGAAAGGATGAGATATACCAAGG
